# Supplementary material for: ZnO nanowire arrays with in situ sequentially self-assembled vertically oriented CdS nanosheets as superior photoanodes for photoelectrochemical water splitting
Source: Royal Society of Chemistry journal article supplement (doi:10.1039/d2se00717g), 2022-01-01
Supplement: d2se00717g1.pdf [file d2se00717g1.pdf]

## Electronic Supplementary Information

# ZnO nanowire arrays with *in situ* sequentially self-assembled vertically oriented CdS nanosheets as superior photoanodes for photoelectrochemical water splitting

Chunmei Li <sup>a,b</sup>, Hua Lin <sup>c</sup>, Maoxiang Jing <sup>d</sup>, Lian Ying Zhang <sup>e</sup>, Weiyong Yuan <sup>a,f,\*</sup>, Chang Ming Li <sup>c</sup>

<sup>a</sup> Ningbo Research Institute, Zhejiang University, Ningbo 315100, China

<sup>b</sup> School of Optoelectronic Science and Engineering, University of Electronic Science and Technology of China, Chengdu 611731, China

<sup>c</sup> School of Materials & Energy, Southwest University, Chongqing 400715, China

<sup>d</sup> Institute for Advanced Materials, School of Materials Science & Engineering, Jiangsu University, Zhenjiang 212013, China

<sup>e</sup> Institute of Materials for Energy and Environment, College of Materials Science and Engineering, Qingdao University, Qingdao 266071, China

<sup>f</sup> College of Chemical and Biological Engineering, Zhejiang University, Hangzhou 310027, China

\* Corresponding Author. Tel./fax: +86 574 88229995. E-mail: wyyuan@zju.edu.cn

### Contents

1. Calculation of photoconversion efficiency.
2. Calculation of flatband potential and donor density.
3. Calculation of Debye length.
4. Calculation of depletion layer width.
5. Large-area top-view and cross-section FESEM images of ZnO NWAs (Figure S1).
6. XRD patterns and their enlarged ones of ZnO NWA, ZnO NW@ZnO NP array, and ZnO NW@CdS NS array (Figure S2).
7. SAED pattern of ZnO NW@CdS NS array (Figure S3).
8. Top-view and cross-section FESEM images of ZnO NWAs grown without the assistance of PEI (Figure S4).
9. Linear sweep voltammograms of ZnO NW@CdS NS with different deposition cycle numbers (Figure S5).
10. PEC performance of representative ZnO-based photoanodes for water splitting (Table S1).

11. Mott–Schottky plots of ZnO NWA, ZnO NW@ZnO NP array, ZnO NW@CdS NP array, and ZnO NW@CdS NS array obtained at frequencies of 800, 1000, and 1200 Hz in the dark (Figure S6).
12. Nyquist and Bode plots of ZnO NWAs, ZnO NW@ZnO NP arrays, ZnO NW@CdS NP arrays, and ZnO NW@CdS NS arrays in dark (Figure S7).
13. Chronoamperometric curve of ZnO NW@CdS NS array after 50 on/off cycles of solar irradiation and LSV curves of ZnO NW@CdS NS array before and after 50 cycles (Figure S8).
14. FESEM image of ZnO NW@CdS NS array after the stability test (Figure S9).

### 1. Calculation of photoconversion efficiency

The photoconversion efficiency of a photoanode was calculated according to the following formula:<sup>1-2</sup>

$$\eta\% = \frac{J(1.23 - V)}{P} \times 100$$

Where J is the current density under simulated sunlight irradiation, V is the applied voltage versus RHE, and P is the light intensity (100 mW•cm<sup>-2</sup>).

### 2. Calculation of flatband potential and donor density

The depletion layer capacitance obtained from the electrochemical impedance spectra can be described by the Mott–Schottky equation:<sup>1,3</sup>

$$\frac{1}{C^2} = \frac{2}{e_0 \varepsilon \varepsilon_0 N_d} \left[ (V - V_{FB}) - \frac{kT}{e_0} \right]$$

where  $e_0$  is the electron charge,  $\varepsilon$  the dielectric constant of ZnO (since the samples are ZnO and ZnO modified with thin layer of CdS, we assume that their dielectric constants are the same<sup>4-6</sup>),  $\varepsilon_0$  the permittivity of vacuum ( $8.85 \times 10^{-12} \text{ N}^{-1} \text{ C}^2 \text{ m}^{-2}$ ),  $N_d$  the donor density,  $V$  the electrode

applied potential,  $V_{FB}$  the flatband potential, and  $\frac{kT}{e_0}$  is a temperature-dependent correction term. Therefore,  $V_{FB}$  can be determined from the intersection point between the extrapolated

linear line and x-axis in Mott–Schottky (M-S) plots ( $\frac{1}{C^2}$  versus  $V$ ) and  $N_d$  can be estimated from the slope of the M-S plots according to the following equation:<sup>1,3</sup>

$$N_d = \frac{2}{e_0 \varepsilon \varepsilon_0} \left[ \frac{d}{C^2} \right]^{-1}$$

### 3. Calculation of Debye length

The charge carrier diffusion lengths (Debye length,  $L_D$ ) for both electrodes were also calculated according to the following equation:<sup>1,7</sup>

$$L_D = \left( \frac{\varepsilon \varepsilon_0 k T}{e^2 N_D} \right)^{\frac{1}{2}}$$

where  $k$  is the Boltzmann constant ( $1.38 \times 10^{-23} \text{ J K}^{-1}$ ) and  $T$  is the absolute temperature (K).

### 4. Calculation of depletion layer width

The depletion layer width ( $W$ ) at 0.0 V vs. SCE can be calculated via the following equation:<sup>1,7</sup>

$$W = \left( \frac{2 \varepsilon \varepsilon_0 \phi}{e^2 N_D} \right)^{\frac{1}{2}}$$

where  $\phi = V - V_{FB}$   $\phi = V - V_{FB}$  is the maximum potential drop in the depletion layer. A potential of 0.0 V was chosen because of the negligible dark current at that potential.

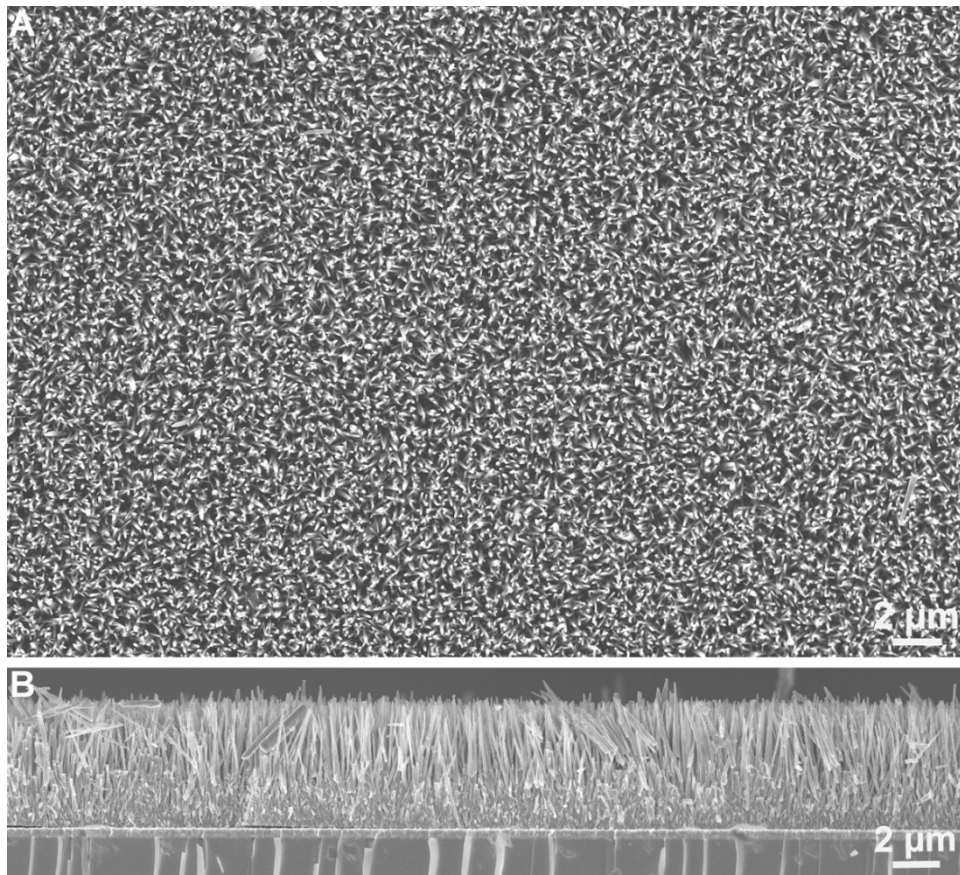

**Figure S1.** Large-area top-view (A) and cross-section (B) FESEM images of ZnO NWAs.

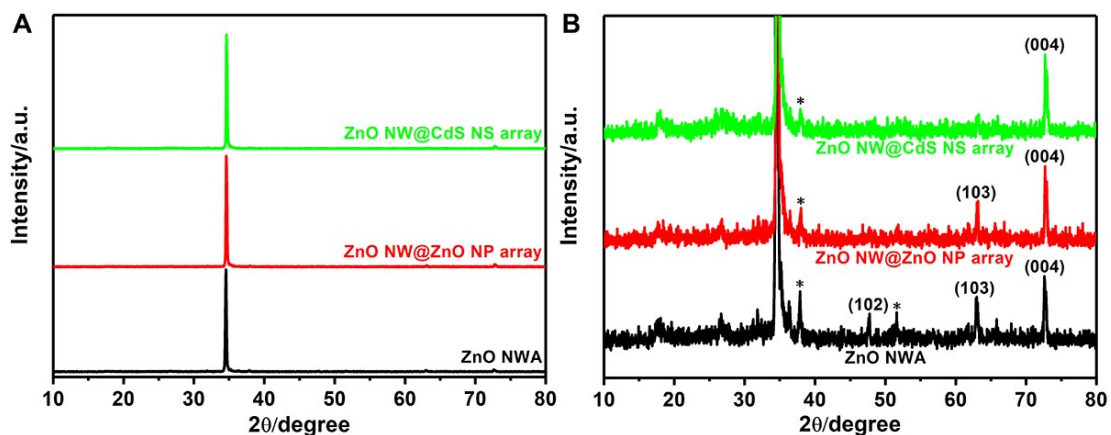

**Figure S2.** XRD patterns (A) and their enlarged ones (B) of ZnO NWA, ZnO NW@ZnO NP array, and ZnO NW@CdS NS array.

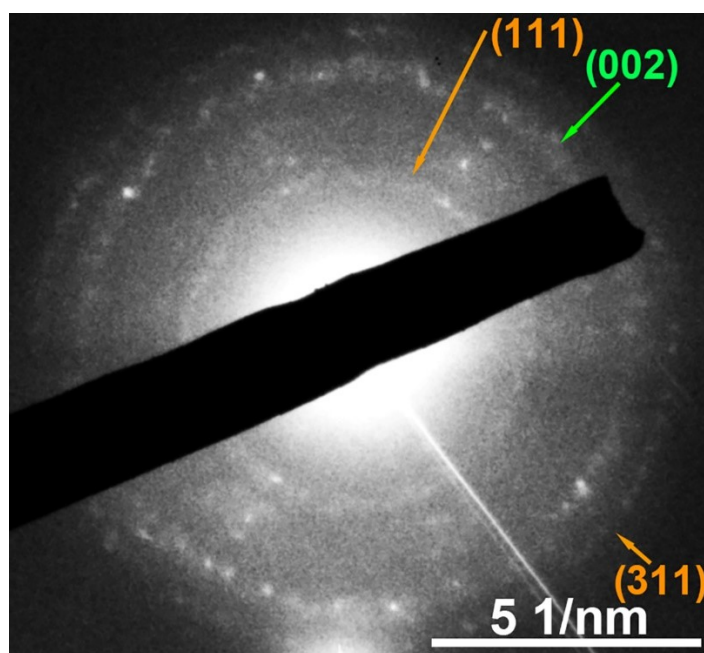

**Figure S3.** SAED pattern of ZnO NW@CdS NS array. Brown and green colors represent the crystal planes of CdS (JPCDS 80-0019) and hexagonal wurtzite ZnO, respectively.

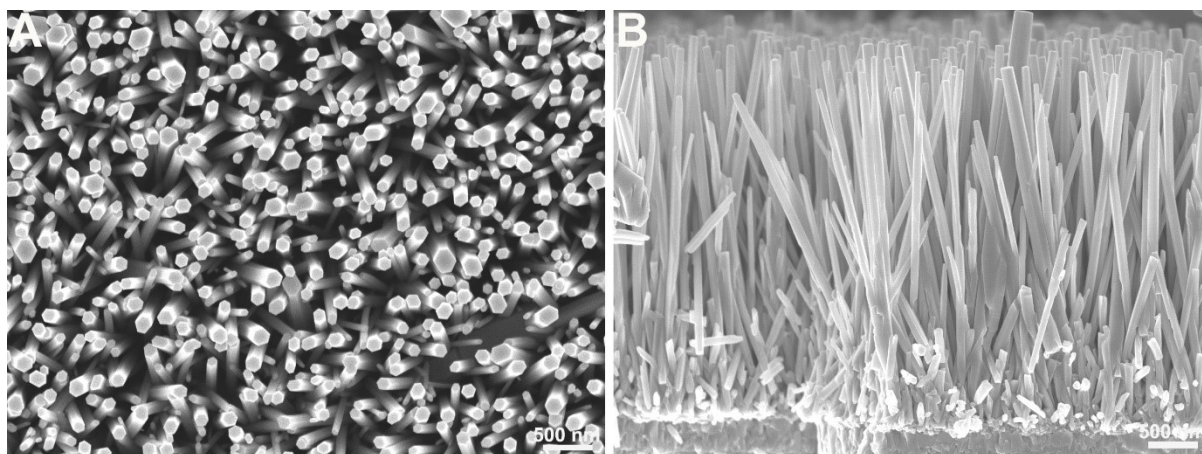

**Figure S4.** Top-view (A) and cross-section (B) FESEM images of ZnO NWAs grown without the assistance of PEI.

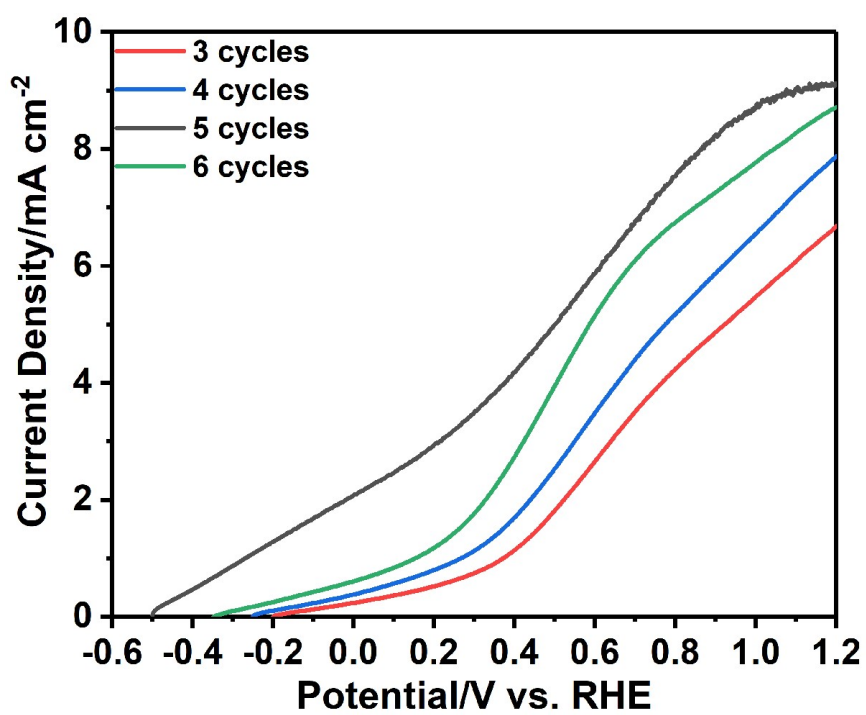

**Figure S5.** Linear sweep voltammograms of ZnO NW@CdS NS with different deposition cycle numbers.

**Table S1.** PEC performance of representative ZnO-based photoanodes for water splitting.

| Photoanode                                                                            | Photocurrent density                        | Onset potential      | Maximum photoconversion Efficiency | Light source used                      | Electrolyte                                                         | Ref.      |
|---------------------------------------------------------------------------------------|---------------------------------------------|----------------------|------------------------------------|----------------------------------------|---------------------------------------------------------------------|-----------|
| ZnO/CdS core/shell nanowire arrays                                                    | 7.23 mA cm <sup>-2</sup> (0 V vs. SCE)      | -1.55 V (vs. SCE)    | 3.53%                              | AM 1.5 G, 100 mW cm <sup>-2</sup>      | 1 M Na <sub>2</sub> S                                               | 8         |
| ZnO/CdTe Core-Shell Nanocable Arrays                                                  | ~5.9 mA cm <sup>-2</sup> (0 V vs. SCE)      | -0.8 V (vs. SCE)     |                                    | AM 1.5 G, 100 mW cm <sup>-2</sup>      | 0.5 M S and 0.3 M Na <sub>2</sub> S                                 | 9         |
| CdSe/ZnO with double layered tubular structure                                        | 2.55 mA cm <sup>-2</sup> (0 V vs. Ag/AgCl)  | -1.1 V (vs. Ag/AgCl) | 1.78%                              | 500 W Xe lamp, 100 mW cm <sup>-2</sup> | 0.1 M Na <sub>2</sub> S                                             | 10        |
| ZnO/GaON nanowire arrays                                                              | 2.25 mA cm <sup>-2</sup> (1.23 V vs. RHE)   | ~0.1 V (vs. RHE)     | 0.85%                              | 500 W Xe lamp, 100 mW cm <sup>-2</sup> | 0.5 M KOH                                                           | 11        |
| CdS NP/ZnO NW heterostructure arrays                                                  | ~4.5 mA cm <sup>-2</sup> (0 V vs. SCE)      | ~-1.3 V (vs. SCE)    |                                    | AM 1.5 G, 100 mW cm <sup>-2</sup>      | 1 M Na <sub>2</sub> S                                               | 12        |
| 3D-branched ZnO NWA-CdS nanoparticle composite                                        | 3.58 mA cm <sup>-2</sup> (0 V vs. Ag/AgCl)  |                      | 3.1%                               | 70 mW cm <sup>-2</sup>                 | 0.5 M Na <sub>2</sub> S                                             | 13        |
| ZnO@Au@ZIF-67                                                                         | 1.93 mA cm <sup>-2</sup> (0.6 V vs. SCE)    | -0.1 V (vs. SCE)     | 0.8%                               | 150 W Xe lamp, 100 mW cm <sup>-2</sup> | 0.5 M Na <sub>2</sub> SO <sub>4</sub>                               | 14        |
| 3D ZnO/TiO <sub>2</sub> /FeOOH                                                        | 1.59 mA cm <sup>-2</sup> (1.8 V vs. RHE)    | 0.14 V (vs. RHE)     | 0.36%                              | AM 1.5 G, 100 mW cm <sup>-2</sup>      | 0.5 M Na <sub>2</sub> SO <sub>4</sub>                               | 15        |
| composition-graded Zn <sub>x</sub> Cd <sub>1-x</sub> Se@ZnO core-shell nanowire array | ~7.4 mA cm <sup>-2</sup> (1.23 V vs. RHE)   | -1.2 V (vs. Ag/AgCl) |                                    | AM 1.5 G, 100 mW cm <sup>-2</sup>      | 0.35 M Na <sub>2</sub> SO <sub>3</sub> and 0.24 M Na <sub>2</sub> S | 16        |
| BiVO <sub>4</sub> /ZnO QDs                                                            | ~5.8 mA cm <sup>-2</sup> (1.23 V vs. RHE)   | ~0.23 V (vs. RHE)    | 1.75%                              | AM 1.5 G, 100 mW cm <sup>-2</sup>      | 0.1 M Na <sub>2</sub> SO <sub>4</sub>                               | 17        |
| ZnO@InP QD                                                                            | 1.2 mA cm <sup>-2</sup> (1.0 V vs. Ag/AgCl) |                      | ~1.3%                              | AM 1.5 G, 100 mW cm <sup>-2</sup>      | 0.5 M Na <sub>2</sub> SO <sub>4</sub>                               | 18        |
| LDH/LFO/ZnO                                                                           | 2.46 mA cm <sup>-2</sup> (1.23 V vs. RHE)   | 0.31 V (vs. RHE)     | 0.76%                              | AM 1.5 G, 100 mW cm <sup>-2</sup>      | 0.5 M Na <sub>2</sub> SO <sub>4</sub>                               | 19        |
| ZnO-CdS core-shell nanocable array                                                    | 6.0 mA cm <sup>-2</sup>                     | -1.3 V (vs. Ag/AgCl) |                                    | AM 1.5 G, 100 mW cm <sup>-2</sup>      | 1 M Na <sub>2</sub> S                                               | 20        |
| Al-ZnO/CdS/TiO <sub>2</sub>                                                           | 11.7 mA cm <sup>-2</sup>                    | ~-0.3 V (vs. RHE)    | 5.9%                               | AM 1.5 G, 100 mW cm <sup>-2</sup>      | 0.25 M Na <sub>2</sub> S and 0.35 M Na <sub>2</sub> SO <sub>3</sub> | 21        |
| Al-ZnO/CdS/Al <sub>2</sub> O <sub>3</sub>                                             | 10.4 mA cm <sup>-2</sup>                    | ~-0.2 V (vs. RHE)    | 5.75%                              | AM 1.5 G, 100 mW cm <sup>-2</sup>      | 0.25 M Na <sub>2</sub> S and 0.35 M Na <sub>2</sub> SO <sub>3</sub> | 22        |
| ZnO-ZnS solid solution nanowire arrays                                                | 1.5 mA cm <sup>-2</sup> (1 V vs. Ag/AgCl)   | -0.7 V (vs. Ag/AgCl) |                                    | AM 1.5 G, 100 mW cm <sup>-2</sup>      | 0.5 M Na <sub>2</sub> S and K <sub>2</sub> SO <sub>3</sub> solution | 23        |
| NiOOH/ZnWO <sub>4</sub> /ZnO                                                          | 1.7 mA cm <sup>-2</sup> (1.23 V vs. RHE)    | ~0.4 V (vs. RHE)     | 0.46%                              | AM 1.5 G, 100 mW cm <sup>-2</sup>      | 0.02 M KOH                                                          | 24        |
| ZnO@CdTe                                                                              | 2.0 mA cm <sup>-2</sup> (1.0 V vs. Ag/AgCl) |                      | 1.83%                              | AM 1.5 G, 100 mW cm <sup>-2</sup>      | 0.5 M Na <sub>2</sub> SO <sub>4</sub>                               | 25        |
| ZnO/CdS/CuSbS <sub>2</sub>                                                            | 6.42 mA cm <sup>-2</sup> (0 V vs. Ag/AgCl)  | -1.1 V vs. Ag/AgCl   |                                    | AM 1.5 G, 100 mW cm <sup>-2</sup>      | 0.35 M Na <sub>2</sub> SO <sub>3</sub> and 0.25 M Na <sub>2</sub> S | 26        |
| ZnO NW@CdS NS array                                                                   | 9.10 mA cm <sup>-2</sup> (1.23 V vs. RHE)   | -0.5 V (vs. RHE)     | 3.72%                              | AM 1.5 G, 100 mW cm <sup>-2</sup>      | 0.2 M Na <sub>2</sub> S                                             | This work |

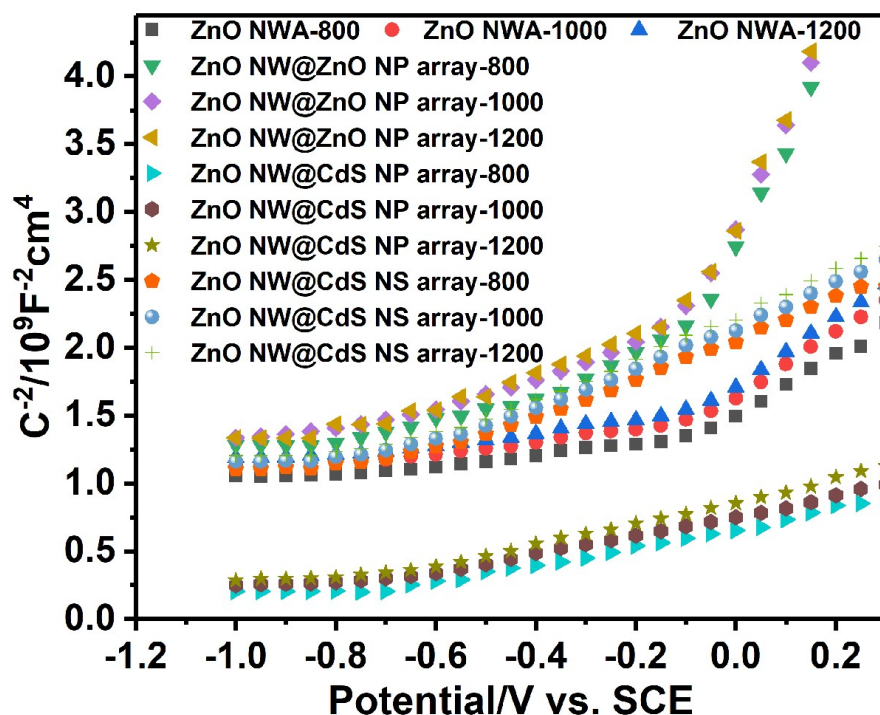

**Figure S6.** Mott–Schottky plots of ZnO NWA, ZnO NW@ZnO NP array, ZnO NW@CdS NP array, and ZnO NW@CdS NS array obtained at frequencies of 800, 1000, and 1200 Hz in the dark.

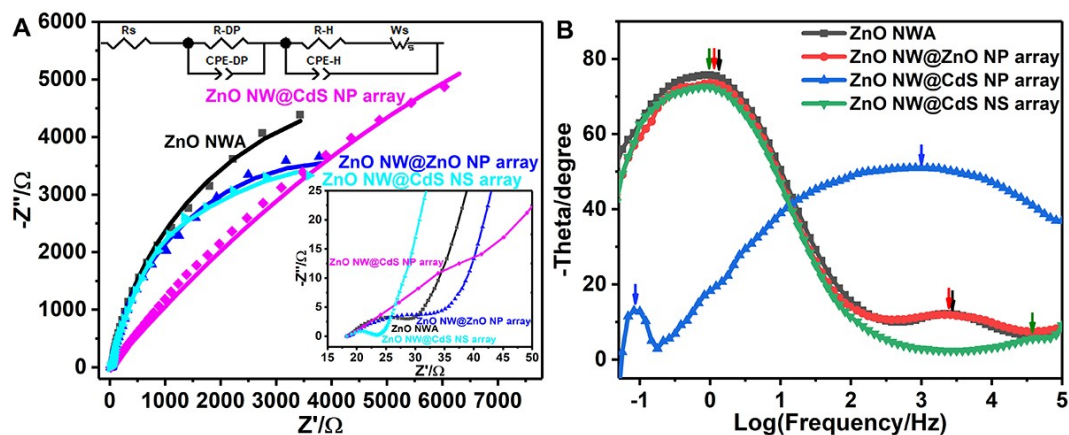

**Figure S7.** Nyquist (A) and Bode (B) plots of ZnO NWAs, ZnO NW@ZnO NP arrays, ZnO NW@CdS NP arrays, and ZnO NW@CdS NS arrays in dark. The inset in the lower right corner of (A) shows Nyquist plots at the high-frequency region, and the one in the upper left corner shows the equivalent circuit used for simulation.

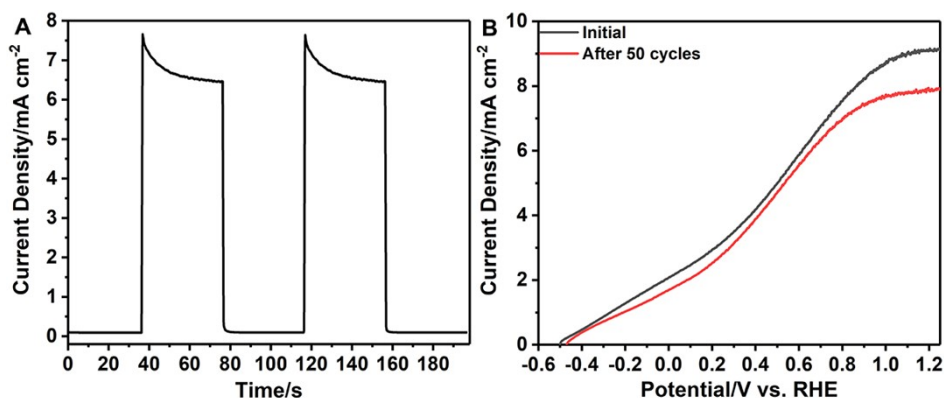

**Figure S8.** (A) Chronoamperometric curve of ZnO NW@CdS NS array after 50 on/off cycles of solar irradiation. (B) LSV curves of ZnO NW@CdS NS array before and after 50 cycles.

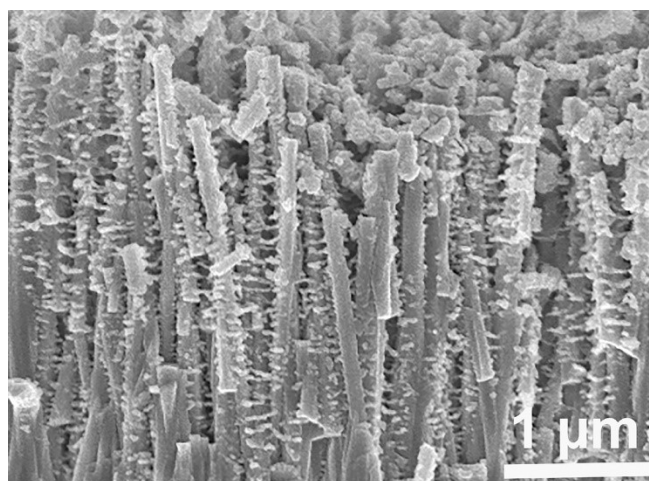

**Figure S9.** FESEM image of ZnO NW@CdS NS array after the stability test.

## References

- [1] W. Yuan, J. Yuan, J. Xie, C. M. Li, *ACS Appl. Mater. Interfaces* **2016**, *8*, 6082.
- [2] Z. Li, W. Luo, M. Zhang, J. Feng, Z. Zou, *Energy Environ. Sci.* **2013**, *6*, 347.
- [3] K. Gelderman, L. Lee, S. W. Donne, *J. Chem. Educ.* **2007**, *84*, 685.
- [4] A. Ghobadi, T. G. U. Ghobadi, F. Karadas, E. Ozbay, *Sci. Rep.* **2018**, *8*, 16322.
- [5] F. Malara, A. Minguzzi, M. Marelli, S. Morandi, R. Psaro, V. D. Santo, A. Naldoni, *ACS Catal.* **2015**, *5*, 5292.
- [6] Q. Rui, L. Wang, Y. Zhang, C. Feng, B. Zhang, S. Fu, H. Guo, H. Hu, Y. Bi, *J. Mater. Chem. A* **2018**, *6*, 7021.
- [7] C. Fàbrega, D. Monllor-Satoca, S. Ampudia, A. Parra, T. Andreu, J. R. Morante, *J. Phys. Chem. C* **2013**, *117*, 20517.
- [8] Y. Tak, S. J. Hong, J. S. Lee, K. Yong, *J. Mater. Chem.* **2009**, *19*, 5945.
- [9] X. N. Wang, H. J. Zhu, Y. M. Xu, H. Wang, Y. Tao, S. Hark, X. D. Xiao, Q. A. Li, *ACS Nano* **2010**, *4*, 3302.
- [10] M. Wang, J. G. Jiang, G. J. Liu, J. W. Shi, L. J. Guo, *Appl. Catal. B* **2013**, *138*, 304.



- [11] H. P. Ma, J. H. Yang, J. J. Tao, K. P. Yuan, P. H. Cheng, W. Huang, J. C. Wang, Q. X. Guo, H. L. Lu, D. W. Zhang, *Nano Energy* **2019**, *66*, 104089.
- [12] Y. Tak, S. J. Hong, J. S. Lee, K. Yong, *Cryst. Growth Des.* **2009**, *9*, 2627.
- [13] Z. Bai, X. Yan, Y. Li, Z. Kang, S. Cao, Y. Zhang, *Adv. Energy Mater.* **2016**, *6*, 1501459.
- [14] Y. Dou, J. Zhou, A. Zhou, J.-R. Li, Z. Nie, *J. Mater. Chem. A* **2017**, *5*, 19491.
- [15] Z. Li, S. Feng, S. Liu, X. Li, L. Wang, W. Lu, *Nanoscale* **2015**, *7*, 19178.
- [16] H. Li, C. Cheng, X. Li, J. Liu, C. Guan, Y. Tay, H. Fan, *J. Phys. Chem. C* **2012**, *116*, 3802.
- [17] J. Li, H. Yuan, J. Li, W. Zhang, Y. Liu, N. Liu, H. Cao, Z. Jiao, *Appl. Catal. B* **2021**, *285*, 119833.
- [18] H. M. Chen, C. K. Chen, C. C. Lin, R. S. Liu, H. Yang, W. S. Chang, K. H. Chen, T. S. Chan, J. F. Lee, D. P. Tsai, *J. Phys. Chem. C* **2011**, *115*, 21971.
- [19] X. Long, C. Wang, S. Wei, T. Wang, J. Jin, J. Ma, *ACS Appl. Mater. Interfaces* **2020**, *12*, 2452.
- [20] Y. Myung, D. M. Jang, T. K. Sung, Y. J. Sohn, G. B. Jung, Y. J. Cho, H. S. Kim, J. Park, *ACS Nano* **2010**, *4*, 3789.
- [21] R. Wang, L. Wang, Y. Zhou, Z. Zou, *Appl. Catal. B* **2019**, *255*, 117738.
- [22] R. Wang, X. Li, L. Wang, X. Zhao, G. Yang, A. Li, C. Wu, Q. Shen, Y. Zhou, Z. Zou, *Nanoscale* **2018**, *10*, 19621.
- [23] H. M. Chen, C. K. Chen, R. S. Liu, C. C. Wu, W. S. Chang, K. H. Chen, T. S. Chan, J. F. Lee, D. P. Tsai, *Adv. Energy Mater.* **2011**, *1*, 742.
- [24] S. Fu, H. Hu, C. Feng, Y. Zhang, Y. Bi, *J. Mater. Chem. A* **2019**, *7*, 2513.
- [25] H. Chen, C. Chen, Y.C. Chang, C. W. Tsai, R. S. Liu, S. F. Hu, W.S. Chang, K.H. Chen, *Angew. Chem. Int. Ed.* **2010**, *49*, 5966.
- [26] R. R. Su, Y. X. Yu, Y. H. Xiao, X. F. Yang, W. D. Zhang, *Int. J. Hydrog. Energy* **2018**, *43*, 6040.
